# Supplementary material
Source: ML conference proceedings conference paper supplement (https://openreview.net/forum?id=Tzh6xAJSll)
Supplement: supplementary_material [file attachment]

## A PROOFS

### A.1 FINITE DATA - PROOF OF PROPOSITION 1

Let us consider the infinite memory model, where an LLM can store in memory all previously seen associations  $(x, y)$ . At each time  $t$ , a random positive integer  $x$  is drawn from some fixed probability distribution. At time  $T$ , the LLM would have seen  $x_1, \dots, x_T$  and the associated  $f_*(x_t)$ , where each  $x_t$  is a random positive integer drawn independently from  $p$ . As such, the LLM would have learned a map  $\hat{f}$ , that only miscorrects the inputs  $x$  which are different from all the  $x_t$  for  $t \in [T]$ . The generalization error reads, with respect to the random dataset  $\mathcal{D}_T = (X_t, Y_t)_{t \in [T]}$ ,

$$\mathbb{E}_{\mathcal{D}_T}[\hat{f}] = \mathbb{P}_{X, \mathcal{D}_T}(X \notin \{X_t\}_{t \in [T]}) = \sum_{x \in [N]} p(x) P_{\mathcal{D}_T}(x \notin \{X_t\}_{t \in [T]}) = \sum_{x \in [N]} p(x)(1 - p(x))^T.$$

Using that  $(1 - a)^T = \exp(T \log(1 - a))$  and  $2 \log(2)a \leq \log(1 + a) \leq a$  for any  $a \geq -1/2$ , we get

$$\begin{aligned} \sum_{x \in [N]} \mathbf{1}_{p(x) \leq 1/2} \cdot p(x) \exp(-2 \log(2)p(x)T) &\leq \sum_{x=2}^N p(x) \exp(-2 \log(2)p(x)T) \\ &\leq \mathbb{E}_{\mathcal{D}_T}[\hat{f}] \leq \sum_{x \in [N]} p(x) \exp(-p(x)T). \end{aligned}$$

Relating this series to the corresponding integral, we have

$$\begin{aligned} &\int_{x \in [1, N]} p(x) \exp(-2 \log(2)p(x)T) dx - 1/T \\ &\leq \int_{x \in [2, p^{-1}(1/T)]} p(x-1) \exp(-2 \log(2)p(x-1)T) dx \\ &\quad + \int_{x \in [p^{-1}(1/T), N]} p(x) \exp(-2 \log(2)p(x)T) dx \\ &\leq \sum_{x=2}^N p(x) \exp(-2 \log(2)p(x)T) \leq \mathbb{E}_{\mathcal{D}_T}[\hat{f}] \leq \sum_{x \in [N]} p(x) \exp(-p(x)T) \\ &\leq \int_{x \in [1, N]} p(x) \exp(-2 \log(2)p(x)T) dx + 1/T \end{aligned}$$

Letting  $N$  goes to infinity, we get the scaling

$$\mathbb{E}_{\mathcal{D}_T}[\hat{f}] \asymp \int_1^\infty p(x) e^{-Tp(x)} dx \pm 1/T. \quad (25)$$

Assuming that  $p(x) = Cf(x)$  for some constant  $C$ , and a smooth strongly decreasing function  $f : \mathbb{R}_+ \rightarrow \mathbb{R}_+$  such that  $\lim_{x \rightarrow 0} f(x) = +\infty$ , one may consider the change of variable  $u = f(x)$ , i.e.,  $x = f^{-1}(u)$ . If so,

$$dx = d(f^{-1})'(u) = \frac{du}{f' \circ f^{-1}(u)}.$$

Hence it holds that

$$\mathbb{E}_{\mathcal{D}_T}[\hat{f}] \asymp \int_1^\infty \frac{-u}{f' \circ f^{-1}(u)} e^{-uT} du. \quad (26)$$

This relates to the Laplace transform of the function inside the integrand. In particular, one can work out that when  $p(x) \propto C_\alpha x^{-\alpha}$ ,  $f^{-1}(u) = u^{-1/\beta}$  from which one can deduce that

$$\int_1^\infty x^{-\alpha} \exp(-Tx^{-\alpha}) dx = \frac{\alpha}{\Gamma(\frac{\alpha-1}{\alpha})} T^{-\frac{\alpha-1}{\alpha}},$$

which recovers a result of Hutter (2021).

## A.2 MEMORY CAPACITY - PROOF OF LEMMA 1

The proof of Lemma 1 concerning quasi orthogonal embeddings can be done through a reasoning on random embeddings. Let  $(X_i)$  be  $P$  independent identically distributed random variables. We are interested in the event where the normalized  $(X_i)$  are  $\eta$ -quasi orthogonal.

$$\begin{aligned} \mathbb{P}(\cap_{\{i,j\} \subset [P]} \{|\langle X_i, X_j \rangle| \leq \eta \|X_i\| \|X_j\|\}) &= 1 - \mathbb{P}(\cup_{\{i,j\} \subset [P]} \{|\langle X_i, X_j \rangle| \geq \eta \|X_i\| \|X_j\|\}) \\ &\geq 1 - \frac{P(P-1)}{2} \mathbb{P}(|\langle X_1, X_2 \rangle| \geq \eta \|X_1\| \|X_2\|). \end{aligned}$$

If this event can happen, it means that there exists such  $\eta$ -quasi orthogonal samples. As a consequence, we are looking to maximize  $\eta$  such that

$$\mathbb{P}(|\langle X_1, X_2 \rangle| \geq \eta \|X_1\| \|X_2\|) < \frac{2}{P(P-1)}. \quad (27)$$

Let us consider  $(X_i)$  to be distributed accordingly to a rotation-invariant probability. By symmetry, we have, with  $f_1$  denoting the first vector of the canonical basis in  $\mathbb{R}^d$ ,

$$\mathbb{P}(|\langle X_1, X_2 \rangle| \geq \eta \|X_1\| \|X_2\|) = \mathbb{P}(|\langle X, f_1 \rangle| \geq \eta \|X\|) = \mathbb{P}(|\langle \frac{X}{\|X\|}, f_1 \rangle| \geq \eta) \quad (28)$$

By symmetry, the vector  $X/\|X\|$  is uniform on the sphere. Using that  $\mathbb{P}(|\langle X, f_1 \rangle| > \eta) = 2\mathbb{P}(\langle X, f_1 \rangle > \eta)$  and

$$\begin{aligned} \mathbb{P}(|\langle X, f_1 \rangle| \geq \eta) &= \frac{2}{\text{Vol}(\mathcal{S}^{d-1})} \int_{x \in \mathcal{S}^{d-1}} \mathbf{1}_{x_1 \geq \eta} dx \\ &= \frac{2}{\text{Vol}(\mathcal{S}^{d-1})} \int_{x_1=\eta}^2 \text{Vol}(\sqrt{1-x_1^2} \cdot \mathcal{S}^{d-2}) dx_1 \\ &= \frac{2 \text{Vol}(\mathcal{S}^{d-2})}{\text{Vol}(\mathcal{S}^{d-1})} \int_{t=\eta}^1 (1-t^2)^{\frac{d-1}{2}} dt = \frac{2\Gamma(\frac{d}{2}+1)}{\sqrt{\pi}\Gamma(\frac{d}{2}+\frac{1}{2})} \int_{t=\eta}^1 (1-t^2)^{\frac{d-1}{2}} dt. \end{aligned}$$

To upper bound this probability, we proceed with

$$\begin{aligned} \mathbb{P}(|\langle X, f_1 \rangle| \geq \eta) &= \frac{2\Gamma(\frac{d}{2}+\frac{1}{2})}{\sqrt{\pi}\Gamma(\frac{d}{2}+\frac{1}{2})} \int_{t=\eta}^1 (1-t^2)^{\frac{d-1}{2}} dt \leq \frac{2(\frac{d}{2}+1)^{1/2}}{\sqrt{\pi}} \int_{t=\eta}^1 \frac{t}{\eta} (1-t^2)^{\frac{d-1}{2}} dt \\ &= \frac{2(\frac{d}{2}+1)^{1/2}}{\sqrt{\pi}} \frac{1}{\eta(d+1)} (1-\eta^2)^{\frac{d+1}{2}} \leq \frac{\sqrt{2}}{\sqrt{\pi}\sqrt{\eta^2 d}} \exp(-\frac{\eta^2 d}{2}). \end{aligned}$$

The last inequality follows from the fact that

$$\frac{(d+2)}{(d+1)^2} = \frac{d+1+1}{d+1} \frac{1}{d+1} = \frac{1+\frac{1}{d+1}}{1+\frac{1}{d}} \frac{1}{d} \leq d^{-1},$$

and that for any  $x \in (-1, 1)$ , the concavity of the logarithm mean that  $\log(1+x) \leq x$  hence that

$$(1+x)^n = \exp(n \log(1+x)) \leq \exp(nx).$$

This leads to the following series of implications

$$\begin{aligned} \exists (X_i) \text{ } \eta\text{-quasi orthogonal} &\Leftrightarrow \frac{1}{\sqrt{\pi}} \left(\frac{\eta^2 d}{2}\right)^{-1/2} \exp(-\frac{\eta^2 d}{2}) \geq \frac{2}{P^2} \\ &\Leftrightarrow \left(\frac{\eta^2 d}{2}\right)^{1/2} \exp(\frac{\eta^2 d}{2}) \geq \frac{P^2}{2\sqrt{\pi}} \\ &\Leftrightarrow \frac{\eta^2 d}{2} \geq 1 \quad \text{and} \quad \exp(\frac{\eta^2 d}{2}) > \frac{P^2}{2\sqrt{\pi}} \\ &\Leftrightarrow \frac{\eta^2 d}{2} \geq 2 \log(P) - \log(2\sqrt{\pi}) \geq 1 \\ &\Leftrightarrow \frac{\eta^2 d}{4} \geq \log(P) \geq \frac{1 + \log(2\sqrt{\pi})}{2}. \end{aligned}$$

Finally, we have proven the existence of a  $\eta$ -quasi orthogonal family for

$$\eta \geq \sqrt{4 \log(P) d^{-1}}, \quad \text{as long as} \quad P \geq 3. \quad (29)$$

### A.3 GENERIC ERROR DECOMPOSITION

The error made by  $f_W$  relates to the ordering between the signals  $u_{f_*(x)} W e_x^\top$  and the noises  $\max_{y \neq f_*(x)} u_y W^\top e_x$ .

Let  $f_q$  be defined as in the main text. We have the following sequence of equivalence, assuming uniqueness of the argument of the maximum for simplicity,

$$\begin{aligned} f_q(x_0) \neq f_*(x_0) &\Leftrightarrow \arg \max_{y \in [M]} \sum_{x \in [N]} q(x) e_x^\top e_{x_0} u_{f_*(x)}^\top u_y \neq f_*(x_0) \\ &\Leftrightarrow \max_{y \in [M]} \sum_{x \in [N]} q(x) e_x^\top e_{x_0} u_{f_*(x)}^\top u_y > \sum_{x \in [N]} q(x) e_x^\top e_{x_0} u_{f_*(x)}^\top u_{f_*(x_0)} \\ &\Leftrightarrow \max_{y \in [M]} \sum_{x \in [N]} q(x) e_x^\top e_{x_0} u_{f_*(x)}^\top (u_y - u_{f_*(x_0)}) > 0. \end{aligned}$$

As a consequence,

$$\begin{aligned} \mathcal{E}(f_q) &= \sum_{x_0 \in [N]} p(x_0) \mathbf{1}_{f_q(x_0) \neq f_*(x_0)} \\ &= \sum_{x_0 \in [N]} p(x_0) \mathbf{1}_{\max_y \sum_{x \in [N]} q(x) e_x^\top e_{x_0} u_{f_*(x)}^\top (u_y - u_{f_*(x_0)}) > 0}. \end{aligned} \quad (30)$$

In other terms, we have proven the following characterization, which holds for any  $q$ , even if derived from a finite number of data,

$$\mathcal{E}(f_q) = p(\{x \in [N] \mid \max_y \sum_{x' \in [N]} q(x') e_{x'}^\top e_x \langle u_{f_*(x')}, u_y - u_{f_*(x)} \rangle > 0\}). \quad (30)$$

### A.4 RANDOM EMBEDDINGS - PROOF OF THEOREM 1

Let us introduce randomness in the model. If each  $e_x \sim \mathcal{N}(0, I)$  is actually an independent random Gaussian vector in  $\mathbb{R}^d$ , we continue our derivation with

$$\begin{aligned} \mathbb{E}_e[\mathcal{E}(f_q)] &= \sum_{x_0 \in [N]} p(x_0) \mathbb{E}_{e_{x_0}} [\mathbb{P}_{(e_x)_{x \neq x_0}} (f_q(x_0) \neq f_*(x_0) \mid e_{x_0})] \\ &= \sum_{x_0 \in [N]} p(x_0) \mathbb{E}_{e_{x_0}} [\mathbb{P}_{(e_x)_{x \neq x_0}} (\max_y \sum_{x \in [N]} q(x) e_x^\top e_{x_0} u_{f_*(x)}^\top (u_y - u_{f_*(x_0)}) > 0 \mid e_{x_0})] \\ &= \sum_{x_0 \in [N]} p(x_0) \mathbb{E}_{e_{x_0}} [\mathbb{P}_{(e_x)_{x \neq x_0}} (\max_y Z_y > 0 \mid e_{x_0})]. \end{aligned}$$

Here, we have introduced the random variables  $Z_y$  for  $y \neq f_*(x_0)$ , inheriting their randomness from  $(e \mid e_{x_0})$ , and defined by

$$Z_y = \sum_{x \in [N]} q(x) e_x^\top e_{x_0} u_{f_*(x)}^\top (u_y - u_{f_*(x_0)}). \quad (31)$$

Those are projections of Gaussian variables, hence are Gaussian. Using the fact that  $\mathbb{E}[e_x] = 0$ , their mean is

$$\mu_y := \mathbb{E}[Z_y] = q(x_0) \|e_{x_0}\|^2 u_{f_*(x_0)}^\top (u_y - u_{f_*(x_0)}). \quad (32)$$

Those variables are correlated. Using the characterization of the mean, we deduce that their covariance reads

$$\begin{aligned} \Sigma_{y_1, y_2} &:= \mathbb{E}[(Z_{y_1} - \mathbb{E}[Z_{y_1}])(Z_{y_2} - \mathbb{E}[Z_{y_2}])] \\ &= \sum_{x, x' \neq x_0} q(x) q(x') \mathbb{E}[e_x^\top e_{x_0} e_{x'}^\top e_{x_0}] u_{f_*(x)}^\top (u_{y_1} - u_{f_*(x_0)}) u_{f_*(x')}^\top (u_{y_2} - u_{f_*(x_0)}) \\ &= (u_{y_1} - u_{f_*(x_0)}) \left( \sum_{x \neq x_0} q(x)^2 e_{x_0}^\top \mathbb{E}[e_x e_x^\top] e_{x_0} u_{f_*(x)}^\top \right) (u_{y_2} - u_{f_*(x_0)}). \\ &= (u_{y_1} - u_{f_*(x_0)}) \left( \sum_{x \neq x_0} q(x)^2 \|e_{x_0}\|^2 u_{f_*(x)} u_{f_*(x)}^\top \right) (u_{y_2} - u_{f_*(x_0)}). \end{aligned}$$

Finally, we obtain the following covariance

$$\Sigma_{y,y'} = \|e_{x_0}\|^2 (u_y - u_{f_*(x_0)})^\top \left( \sum_{x \neq x_0} q(x)^2 u_{f_*(x)} u_{f_*(x)}^\top \right) (u_{y'} - u_{f_*(x_0)}). \quad (33)$$

We are left with the computation of the probability that the maximum of the  $n$  correlated, non-centered, exchangeable, Gaussian variables  $(Z_y)$  is bigger than zero.

**Generic upper bound.** Since we do not care about the scaling with respect to  $M$ , we proceed with

$$\max_{y \in [M]} \mathbb{P}(Z_y \leq 0) \leq \mathbb{P}(\max_y Z_y \leq 0) \leq \sum_{y \in [M]} \mathbb{P}(Z_y \leq 0) \leq M \max_{y \in [M]} \mathbb{P}(Z_y \leq 0), \quad (34)$$

which leads to

$$\begin{aligned} & \mathbb{P}_{(e_x)_{x \neq x_0}} \left( \max_y \sum_{x \in [N]} q(x) e_x^\top e_{x_0} u_{f_*(x)}^\top (u_y - u_{f_*(x_0)}) > 0 \mid e(x_0) \right) \\ & \leq \sum_{y \neq f_*(x_0)} \exp(-\mathbf{1}_{\mu_y < 0} \frac{\mu_y^2}{2\Sigma_{y,y}}) \\ & = \sum_{y \neq f_*(x_0)} \exp(-\mathbf{1}_{\langle u_{f_*(x_0)}, u_y - u_{f_*(x_0)} \rangle < 0} \frac{\|e_{x_0}\|^2}{2} \cdot \frac{q(x_0)^2 \langle u_{f_*(x_0)}, u_y - u_{f_*(x_0)} \rangle^2}{\sum_{x \neq x_0} q(x)^2 \langle u_{f_*(x)}, u_y - u_{f_*(x_0)} \rangle^2}). \end{aligned}$$

Finally, recognizing a  $\chi^2$ -variable with  $d$  degrees of freedom, for any  $a > 0$ ,

$$\mathbb{E}[\exp(-a\|e_{x_0}\|^2)] = (1 + 2a)^{-d/2} = \exp(-\frac{d}{2} \log(1 + 2a)).$$

This leads to the final bound, with  $\chi_{u,x} = \min_{y \in [M]} \mathbf{1}_{\langle u_{f_*(x)}, u_y - u_{f_*(x)} \rangle \leq 0}$ .

$$\mathbb{E}_e[\mathcal{E}(f_q)] \leq \sum_{x \in [N]} p(x) \min\{1, \sum_{y \neq f_*(x)} \left(1 + \frac{q(x)^2 \langle u_{f_*(x)}, u_y - u_{f_*(x)} \rangle^2}{\sum_{x' \neq x} q(x')^2 \langle u_{f_*(x')}, u_y - u_{f_*(x)} \rangle^2}\right)^{-\frac{d}{2} \cdot \chi_{u,x}}\}. \quad (35)$$

This holds for any unembedding  $u$  and associative weight scheme  $q$ . In the following, we will assume that the unembedding  $u$  are such that  $\chi_{u,x} = 1$ , which is notably the case when the  $u_y$  are normalized (i.e.,  $u_y \in \mathcal{S}^{d-1}$ ).

**Matching lower bound.** Going back to (34), one can get a matching lower bound.

$$\begin{aligned} \mathbb{E}_e[\mathcal{E}(f_q)] & \geq \sum_{x \in [N]} p(x) \mathbb{E}_{e_x} \left[ \max_{y \neq f_*(x)} \mathbb{P}(Z_y \leq 0 \mid e_x) \right] \\ & \geq \sum_{x \in [N]} p(x) \max_{y \neq f_*(x)} \mathbb{E}_{e_x} [\mathbb{P}(Z_y \leq 0 \mid e_x)] \\ & = \frac{1}{2} \sum_{x \in [N]} p(x) \left(1 - \max_{y \neq f_*(x)} \mathbb{E}_{e_x} \left[ \operatorname{erf}\left(\frac{\mu_y}{\sqrt{2\Sigma_{y,y}}}\right) \right] \right). \end{aligned}$$

To conclude, we need an inequality of anti-concentration for Gaussian variables. In essence, we should distinguish two type of inputs  $x \in [N]$ :

- the ones where  $\mu_y/\Sigma_{y,y}$  will be large enough to store the association  $u_{f_*(x)} e_x^\top$ , which will lead to an error decreasing exponentially fast;
- the ones where the same ratio is too small and that we should count in the lower bound.

Following this split, one can go for the simple “survival” lower bound

$$\begin{aligned}
\mathbb{E}_e[\mathcal{E}(f_q)] &\geq \sup_{t>0} \frac{1 - \text{erf}(t)}{2} \sum_{x_0 \in [N]} p(x_0) \max_{y \neq f_*(x_0)} \mathbb{E}_{e_{x_0}} [\mathbf{1}_{\mu_y^2 \leq 2\Sigma_{y,y} t^2}] \\
&= \sup_{t>0} \frac{1 - \text{erf}(t)}{2} \sum_{x_0 \in [N]} p(x_0) \max_{y \neq f_*(x_0)} \cdots \\
&\quad \mathbb{P}_{e_{x_0}} (\|e_{x_0}\|^2 q(x_0)^2 \langle u_{f_*(x_0)}, u_y - u_{f_*(x_0)} \rangle^2 \leq 2t^2 \sum_{x \neq x_0} q(x)^2 \langle u_{f_*(x)}, u_y - u_{f_*(x_0)} \rangle^2). \\
&\geq \sup_{t,s>0} \frac{1 - \text{erf}(t)}{2} \sum_{x_0 \in [N]} p(x_0) \mathbb{P}_{e_{x_0}} (\|e_{x_0}\|^2 \leq s) \max_{y \neq f_*(x_0)} \cdots \\
&\quad \mathbf{1}_{sq(x_0)^2 \langle u_{f_*(x_0)}, u_y - u_{f_*(x_0)} \rangle^2 \leq 2t^2 \sum_{x \neq x_0} q(x)^2 \langle u_{f_*(x)}, u_y - u_{f_*(x_0)} \rangle^2}.
\end{aligned}$$

Without optimizing for constants, taking  $t = 1/\sqrt{2}$  and  $s = d$ , we get the simple “survival bound” that there exists a constant  $c$  such that

$$\mathbb{E}_e[\mathcal{E}(f_q)] \geq c \sum_{x \in [N]} p(x) \mathbf{1}_{dq(x)^2 \langle u_{f_*(x)}, u_y - u_{f_*(x)} \rangle^2 \leq \sum_{x' \neq x} q(x')^2 \langle u_{f_*(x')}, u_y - u_{f_*(x)} \rangle^2}. \quad (36)$$

The constant can be computed explicitly as

$$c = \frac{1 - \text{erf}(1/\sqrt{2})}{2} \cdot \mathbb{P}(\|e_{x_0}\|^2 \leq d) > 0.158 \cdot 1/2 = 0.079,$$

where we have used that  $\|e_{x_0}\|^2$  is a  $\chi^2$ -variable with mean  $d$  hence smaller median, which implies that  $\mathbb{P}(\|e_{x_0}\|^2 < d) > 1/2$ .

**Quasi-orthogonal output embeddings.** Let us consider  $u : [M] \rightarrow \mathbb{R}^d$  such that  $(u_y)_{y \in [M]}$  is  $\eta$ -quasi orthogonal.

*Upper bound.* Going back to (35), we can work out a lower bound with

$$\begin{aligned}
&\frac{q(x_0)^2 \langle u_{f_*(x_0)}, u_y - u_{f_*(x_0)} \rangle^2}{\sum_{x \neq x_0} q(x)^2 \langle u_{f_*(x)}, u_y - u_{f_*(x_0)} \rangle^2} \\
&\geq \frac{q(x_0)^2 (1 - \eta)^2}{\sum_{x \neq x_0} q(x)^2 (\mathbf{1}_{f_*(x)=y} (1 + \eta)^2 + \mathbf{1}_{f_*(x)=f_*(x_0)} (1 - \eta)^2 + \mathbf{1}_{f_*(x) \notin \{y, f_*(x_0)\}} 4\eta^2)} \\
&\geq \frac{q(x_0)^2 (1 - \eta)^2}{4 \sum_{x \neq x_0} q(x)^2 (\mathbf{1}_{f_*(x)=y} + \mathbf{1}_{f_*(x)=f_*(x_0)} + \mathbf{1}_{f_*(x) \notin \{y, f_*(x_0)\}} \eta^2)} \\
&= \frac{1}{4} \frac{q(x_0)^2 (1 - \eta)^2}{\sum_x q(x)^2 ((1 - \eta^2) \mathbf{1}_{f_*(x) \in \{y, f_*(x_0)\}} + \eta^2) - q(x_0)^2} \\
&= \frac{1}{4} \frac{q(x_0)^2 (1 - \eta)^2}{\eta^2 \|q\|^2 + (1 - \eta^2) \sum_{x; f_*(x) \in \{y, f_*(x_0)\}} q(x)^2 - q(x_0)^2} \\
&= \frac{1}{4} \frac{q(x_0)^2 (1 - \eta)^2}{\eta^2 \|q\|^2 + (1 - \eta^2) (Q_y + Q_{f_*(x_0)}) - q(x_0)^2}.
\end{aligned}$$

Here, we have used that for the numerator

$$\langle u_{f_*(x_0)}, u_y - u_{f_*(x_0)} \rangle^2 = (\langle u_{f_*(x_0)}, u_y \rangle - 1)^2 \geq (1 - \eta)^2,$$

and the same for the term in the denominator (since their ratio cancels out), as well as

$$\langle u_y, u_y - u_{f_*(x_0)} \rangle^2 \leq (1 + \eta)^2, \quad \langle u_{f_*(x)}, u_y - u_{f_*(x_0)} \rangle^2 \leq (2\eta)^2.$$

Moreover, we have introduced

$$Q_y = \sum_{x'; f(x')=y} q(x')^2. \quad (37)$$

Using the fact that  $(1+x)^d = \exp(d \log(1+x)) \leq \exp(dx)$ , an upper bound directly follows from those derivations,

$$\mathbb{E}_e[\mathcal{E}(f_q)] \leq \sum_{x_0 \in [N]} p(x_0) \min\{1, M \exp\left(-\frac{d(1-\eta)^2}{2} \frac{q(x_0)^2}{4\eta^2\|q\|_2^2 + 2Q_\infty}\right)\}, \quad (38)$$

where

$$Q_\infty = \max_{y \in [M]} Q_y = \max_{y \in [M]} \sum_{x: f_*(x)=y} q(x)^2. \quad (39)$$

*Matching lower bound.* Similarly, one can work out a lower bound with

$$\begin{aligned} \frac{q(x_0)^2 \langle u_{f_*(x_0)}, u_y - u_{f_*(x_0)} \rangle^2}{\sum_{x \neq x_0} q(x)^2 \langle u_{f_*(x)}, u_y - u_{f_*(x_0)} \rangle^2} &\leq \frac{q(x_0)^2 (1+\eta)^2}{\sum_{x \neq x_0} q(x)^2 (\mathbf{1}_{f_*(x)=y} (1-\eta)^2 + \mathbf{1}_{f_*(x)=f_*(x_0)} (1+\eta)^2)} \\ &\leq \frac{q(x_0)^2}{\frac{1-\eta}{1+\eta} Q_y + Q_{f_*(x)} - q(x_0)^2}. \end{aligned}$$

Combining this with (36), we get the lower bound, with  $c = .079$ ,

$$\mathbb{E}_e[\mathcal{E}(f_q)] \geq c \sum_{x \in [N]} p(x) \mathbf{1}_{(d+1)q(x)^2 \leq \frac{1-\eta}{1+\eta} Q_\infty}. \quad (40)$$

Remark that in the previous lower bound, we have dropped the previous factor  $\eta^2\|q\|^2$  that appears in the upper bound. We expect this term to actually be present in a tighter error characterization. In essence, we expect the embeddings to fill the full space  $\mathcal{S}^{d-1}$  so that most of the difference  $\langle u_{f_*(x)}, u_y - u_{f_*(x_0)} \rangle^2$  typically behave as  $\eta^2$ . However, quantifying this precisely is beyond the scope of this paper.

**Random output embeddings.** In the case where the output embeddings are random, we can distinguish two cases. The cases where the embeddings are  $\eta$ -quasi orthogonal, where one can retake the previous derivations, and the case where they are not, which will have a small probability if  $\eta$  is large enough.

Consider  $u$  to be random embeddings taking uniformly on the unit sphere. Let us introduce the event

$$E_\eta = \{u \text{ is } \eta\text{-quasi orthogonal}\}.$$

We have seen in the proof of Lemma 1 that

$$1 - \mathbb{P}(E_\eta) \leq \frac{M^2}{2\sqrt{\pi}} \sqrt{\frac{2}{\eta^2 d}} \exp\left(-\frac{\eta^2 d}{2}\right). \quad (41)$$

For any random variable  $Z$  that is bounded by one, we have the bounds

$$\mathbb{P}(E) \mathbb{E}[Z|E] \leq \mathbb{E}[Z] = (1 - \mathbb{P}(E)) \mathbb{E}[Z|\neg E] + \mathbb{P}(E) \mathbb{E}[Z|E] \leq (1 - \mathbb{P}(E)) + \mathbb{E}[Z|E]. \quad (42)$$

The upper bound of Theorem 1 directly follows from plugging (38) and (41) into this last equation

$$\mathbb{E}_{e,u}[\mathcal{E}(f_q)] \leq \frac{M^2}{2\sqrt{\pi}} \sqrt{\frac{2}{\eta^2 d}} \exp\left(-\frac{\eta^2 d}{2}\right) + \sum_{x \in [N]} p(x_0) \sum_{y \neq f_*(x_0)} \left(1 + \frac{(1-\eta)^2}{4} \frac{q(x_0)^2}{\|q\|_2^2}\right)^{-\frac{d}{2}}. \quad (43)$$

Since this is true for any  $\eta$ , one can consider the infimum in the upper bound.

In term of lower bound, retaking (40),

$$\mathbb{E}_{e,u}[\mathcal{E}(f_q)] \geq \sup_{\eta \geq 0} c \left(1 - \frac{M^2}{2\sqrt{\pi}} \sqrt{\frac{2}{\eta^2 d}} \exp\left(-\frac{\eta^2 d}{2}\right)\right) \sum_{x \in [N]} p(x) \mathbf{1}_{(d+1)q(x)^2 \leq 2\frac{1-\eta}{1+\eta} Q_\infty}. \quad (44)$$

In particular, when  $d > 8 \log(M)$  one can consider  $\eta < 1/2$  such that  $\eta^2 d > 4 \log(M)$ , which leads to  $(\eta - 1)/(\eta + 1) > 1/3$ , and, if  $M \geq 4$

$$1 - \frac{M^2}{2\sqrt{\pi}} \sqrt{\frac{2}{\eta^2 d}} \exp\left(-\frac{\eta^2 d}{2}\right) \geq 1 - \frac{1}{2\sqrt{\pi}} \frac{1}{\sqrt{2 \log(M)}} > 2/3.$$

All together we have proven that, as long as  $M \geq 4$  and  $d \geq 8 \log(M)$  with  $c_1 > .079 \cdot 2/3 > .052$  and  $c_2 > 1/3$ ,

$$\mathbb{E}_{e,u}[\mathcal{E}(f_q)] \geq c_1 \sum_{x \in [N]} p(x) \mathbf{1}_{(d+1)q(x)^2 \leq c_2 Q_\infty}. \quad (45)$$

**Writing upper bounds as survival bounds.** Until now, we have written the upper bounds as the sum of exponential (38) and the lower bounds as a sum of missed associations (45), which we called “survival” bound. In order to best read how tight our characterization is, one can rewrite the upper bounds as survival bounds. In particular, as we did in the lower bound, we will dissociate  $x$  corresponding to a small exponential and the other ones. Using the fact that the  $p(x)$  sum to one, we get, when the output embeddings are  $\eta$ -quasi orthogonal,

$$\begin{aligned}\mathbb{E}_e[\mathcal{E}(f_q)] &\leq \sum_{x_0 \in [N]} p(x_0) \min\{1, M \exp(-\frac{d(1-\eta)^2}{2} \frac{q(x_0)^2}{4\eta^2\|q\|_2^2 + 2Q_\infty})\} \\ &\leq \sum_{x_0 \in [N]} p(x_0) \inf_{t>0} M \exp(-\frac{t(1-\eta)^2}{4}) + \mathbf{1}_{dq(x_0)^2 \leq t(2\eta^2\|q\|_2^2 + Q_\infty)} \\ &\leq \inf_{t>0} \exp(-\frac{t(1-\eta)^2}{4} + \log(M)) + \sum_{x \in [N]} p(x) \mathbf{1}_{dq(x)^2 \leq t(2\eta^2\|q\|_2^2 + Q_\infty)}.\end{aligned}$$

To simplify the bound, consider the constraints

$$\eta^2 \leq Q_\infty/\|q\|_2^2, \quad \text{and} \quad \eta < 1/2, \quad (46)$$

we get, using  $t = 16(\log(M) + \gamma \log(d))$  for  $\gamma > 0$ , we get

$$\begin{aligned}\mathbb{E}_e[\mathcal{E}(f_q)] &\leq \inf_{t>0} \exp(-\frac{t(1-\eta)^2}{4} + \log(M)) + \sum_{x \in [N]} p(x) \mathbf{1}_{dq(x)^2 \leq t(2\eta^2\|q\|_2^2 + Q_\infty)} \\ &\leq \inf_{t>0} \exp(-\frac{-t + 16 \log(M)}{16}) + \sum_{x \in [N]} p(x) \mathbf{1}_{dq(x)^2 \leq 3tQ_\infty} \\ &\leq \exp(-\gamma \log(d)) + \sum_{x \in [N]} p(x) \mathbf{1}_{dq(x)^2 \leq 48(\log(M) + \gamma \log(d))Q_\infty}.\end{aligned}$$

Finally, when the output embedding are  $\eta$ -quasi orthogonal with  $\eta$  satisfying (46), we get

$$\mathbb{E}_e[\mathcal{E}(f_q)] \leq \inf_{\gamma>0} d^{-\gamma} + \sum_{x \in [N]} p(x) \mathbf{1}_{dq(x)^2 \leq 48(\log(M) + \gamma \log(d))Q_\infty}. \quad (47)$$

When the unembeddings are chosen at random, when  $d > 8 \log(M)$ , one can choose  $\eta < 1/2$ , and (43) is cast as, chosen  $d\eta^2 = 4 \log(M) + 2\gamma \log(d)$ ,

$$\begin{aligned}\mathbb{E}_{e,u}[\mathcal{E}(f_q)] &\leq \inf_{\eta,\gamma} \frac{M^2}{2\sqrt{\pi}} \sqrt{\frac{2}{\eta^2 d}} \exp(-\frac{\eta^2 d}{2}) \\ &\quad + d^{-\gamma} + \sum_{x \in [N]} p(x) \mathbf{1}_{dq(x)^2 \leq 16(\log(M) + \gamma \log(d))(2\eta^2\|q\|_2^2 + Q_\infty)} \\ &\leq \inf_{\gamma} \frac{d^{-\gamma}}{2\sqrt{\pi} \sqrt{2 \log(M) + \gamma \log(d)}} \\ &\quad + d^{-\gamma} + \sum_{x \in [N]} p(x) \mathbf{1}_{dq(x)^2 \leq 16(\log(M) + \gamma \log(d))(\frac{8 \log(M) + 4\gamma \log(d)}{d} \|q\|_2^2 + Q_\infty)} \\ &\leq \inf_{\gamma} 2d^{-\gamma} + \sum_{x \in [N]} p(x) \mathbf{1}_{dq(x)^2 \leq 16(\log(M) + \gamma \log(d))(\frac{8 \log(M) + 4\gamma \log(d)}{d} \|q\|_2^2 + Q_\infty)}.\end{aligned}$$

Finally, we have shown that when the embeddings are taken at random

$$\mathbb{E}_{e,u}[\mathcal{E}(f_q)] \leq \inf_{\gamma} 2d^{-\gamma} + \sum_{x \in [N]} p(x) \mathbf{1}_{dq(x)^2 \geq 16(\log(M) + \gamma \log(d))(\frac{8 \log(M) + 4\gamma \log(d)}{d} \|q\|_2^2 + Q_\infty)}. \quad (48)$$

## A.5 PROOF OF PROPOSITION 2

When  $p(x) \simeq x^{-\alpha}$ ,  $q(x) = p(x)^\rho \simeq x^{-\rho\alpha}$ , hence,

$$p(\{x \in [N] \mid dq(x)^2 \leq p_* \|q\|^2\}) \simeq p(\{x \in [N] \mid x \leq (d\|q\|^{-2})^{1/2\rho\alpha}\}) \simeq (d\|q\|^{-2})^{-(\alpha-1)/2\rho\alpha}.$$

We are left with the computation of  $\varphi(N) := \|q\|^2 \simeq \int_1^N q(x)^2 dx \simeq \int_1^N x^{-2\rho\alpha} dx$ . When  $2\rho\alpha > 1$ , this integral reads  $1 - N^{-2\rho\alpha+1}$  which is bounded by one.

### A.6 PROOF OF PROPOSITION 3

When  $p(x) \simeq x^{-\alpha}$ ,  $q(x) = \mathbf{1}_{x \in [P]} p(x)^\rho \simeq \mathbf{1}_{x \in [P]} x^{-\rho\alpha}$ , we get

$$\begin{aligned} p(\{x \in [N] \mid dq(x)^2 \leq p_* \|q\|^2\}) &= p(\{x \in [P] \mid dq(x)^2 \leq p_* \|q\|^2\}) + p(\{x > P\}) \\ &\simeq \left(\frac{d}{\varphi(P)}\right)^{-(\alpha-1)/2\rho\alpha} + P^{-\alpha+1}. \end{aligned}$$

The optimal threshold  $P$  is set by equalizing the two terms, which we compute as

$$\begin{aligned} \left(\frac{d}{\varphi(P)}\right)^{-(\alpha-1)/2\rho\alpha} &= P^{-\alpha+1} \\ \Leftrightarrow \quad \frac{-\alpha+1}{2\rho\alpha} \log(d) - \frac{-\alpha+1}{2\rho\alpha} \log(P) &= (-\alpha+1) \log(P) \\ \Leftrightarrow \quad \log(d) - \log(P) &= 2\rho\alpha \log(P) \\ \Leftrightarrow \quad P &= d^{1/(2\rho\alpha+1)}. \end{aligned}$$

This choice of  $P$  leads to a scaling in, with  $f_{\rho,[P]} = f_{q_{\rho,[P]}}$ ,

$$\mathbb{E}_{e,u}[\mathcal{E}(f_{\rho,[P]})] \stackrel{(\log)}{\asymp} p(\{x \in [N] \mid dq(x)^2 \leq p_* \|q\|^2\}) \simeq P^{-(\alpha-1)} = d^{-(\alpha-1)/(2\rho\alpha+1)}.$$

### A.7 PROOF OF THEOREM 2

The lower bound directly follows from (8) together with  $Q_\infty = p_* \|q\|^2$  and the fact that  $q$  is invariant to rescaling, so the best we can do is fit as much memories  $P$  as we can until reaching  $3(d+1) = p_* P$  leading to a scaling in  $\int_P^\infty p(x) dx = C_\alpha P^{-\alpha+1}/(\alpha+1)$ .

### A.8 PROOF OF PROPOSITION 4

In order to get scaling with both finite data and finite memory simultaneously, we used a simple strategy:

- With high probability  $1 - cT^{-1+1/\alpha}$  for some constant  $c$ ,  $\hat{q}$  is similar to  $q$ .
- When  $\hat{q}$  is similar to  $q$ , the scaling with  $d$  derived from Theorem 1 is left unchanged by substituting  $q$  by  $\hat{q}$ .

Rather than using a uniform concentration inequality on the full  $\hat{q}$ , we will proceed individually on each  $\hat{q}(x)$ . Denoting by  $\mathcal{D}_T$  the random dataset of  $T$  data, for any sequence of set  $(E_x)_{x \in [N]}$  –typically we will choose  $E_x = \{\hat{q}(x) > q(x)/2\}$ ,

$$\begin{aligned} \mathbb{E}_{u,e,\mathcal{D}_T}[\mathcal{E}(f_{\hat{q}})] &= \sum p(x) \mathbb{P}_{u,e,\mathcal{D}_T}(f(x) \neq f_*(x)) \\ &\leq \sum p(x) \mathbb{P}_{u,e,T}(\hat{q} \notin E_x) + \sum p(x) \mathbb{P}_{u,e,T}(f(x) \neq f_*(x) \mid \hat{q} \in E_x). \end{aligned}$$

The second term has been worked out before, using that  $Q_\infty \leq \|q\|_2^2$

$$\begin{aligned} \mathbb{P}_{u,e,T}(f(x) \neq f_*(x) \mid \hat{q} \in E_x) &\leq \inf_\gamma 2d^{-\gamma} + \mathbb{P}_T(d\hat{q}(x)^2 \leq 16c_\gamma(\hat{Q}_\infty + \frac{8c_\gamma \|\hat{q}\|_2^2}{d}) \mid \hat{q} \in E_x). \\ &\leq \inf_\gamma 2d^{-\gamma} + \mathbb{P}_T(d\hat{q}(x)^2 \leq c'_\gamma \|\hat{q}\|_2^2 \mid \hat{q} \in E_x), \end{aligned}$$

where  $c'_\gamma = 16c_\gamma(1 + \frac{8c_\gamma}{d})$ .

**Without thresholding.** Let us first start with the scheme (11), with  $\rho > 0$

$$\hat{q}(x) = \left(\frac{1}{T} \sum_{t \in [T]} \mathbf{1}_{x=X_t}\right)^\rho, \quad q(x) = p(x)^\rho.$$

Using a simplification of Chernoff bound for Bernoulli variables (see e.g., Hoeffding, 1963), we get the probability bound (the randomness being due to the data),

$$\mathbb{P}_T(\hat{q}(x) < \frac{q(x)}{2^{1/\rho}}) = \mathbb{P}_T(\hat{p}(x) < \frac{p(x)}{2}) \leq \exp(-Tp(x)/8).$$



As a consequence, reusing the proof of Proposition 1, when  $p$  follows a Zipf law (1),

$$\begin{aligned}\mathbb{E}[\mathcal{E}(f_{\hat{q}})] &= \sum p(x) \mathbb{P}(f(x) \neq f_*(x)) \\ &\leq \sum p(x) \exp(-Tp(x)/8) + \sum p(x) \mathbb{P}(f(x) \neq f_*(x) \mid \hat{q}(x) > q(x)/2^{1/\rho}) \\ &\lesssim T^{-1+1/\alpha} + \sum p(x) \mathbb{P}(f(x) \neq f_*(x) \mid \hat{q}(x) > q(x)/2^{1/\rho}).\end{aligned}$$

We are left with the computation of the second term, denote  $c_\rho = 2^{-1/\rho}$ , we have

$$\mathbb{E}_{u,e} \mathbb{P}_T(f(x) \neq f_*(x) \mid \hat{q}(x) > c_\rho q(x)) \leq \inf_{\gamma} 2d^{-\gamma} + \mathbb{P}_T(d\hat{q}(x)^2 \leq c'_\gamma \|\hat{q}\|_2^2 \mid \hat{q} \geq q(x)/2).$$

By definition of  $\hat{q}$ , together with Jensen's inequality when  $\rho \leq 1/2$

$$\frac{1}{N} = \frac{1}{N} \sum_{x \in [N]} (q(x)^2)^{1/2\rho} \geq (\frac{1}{N} \|q\|_2^2)^{1/2\rho},$$

hence  $\|q\|^2 \leq N^{1-2\rho}$ . When  $\rho > 1/2$ , the worst value of  $\|q\|$  is when all the mass is concentrated on one  $q(x')$ , in which case  $\|q\|^2 \leq 1$ . With the corresponding  $\psi(N)$ , we get

$$\mathbb{E}_{u,e} \mathbb{P}_T(f(x) \neq f_*(x) \mid \hat{q}(x) > c_\rho q(x)) \leq \inf_{\gamma} 2d^{-\gamma} + \mathbf{1}_{dc_\rho^2 q(x)^2 \leq c'_\gamma \psi(N)}.$$

Finally, reusing the proof of Proposition 2, and hiding logarithmic factors,

$$\begin{aligned}\mathbb{E}[\mathcal{E}(f_{\hat{q}})] &= \sum p(x) \mathbb{P}(f(x) \neq f_*(x)) \\ &\lesssim T^{-1+1/\alpha} + \inf_{\gamma} 2d^{-\gamma} + p(\{x \mid dc_\rho^2 q(x)^2 \leq c'_\gamma \psi(N)\}) \\ &\lesssim T^{-1+1/\alpha} + (\frac{d}{\psi(N)})^{-(\alpha-1)/2\rho\alpha}.\end{aligned}$$

The case  $\rho = 0$ , can be easily treated by considering an error if and only if the number of seen elements  $|\{x_t \mid t \in [T]\}|$  is smaller than  $d$ .

**With thresholding.** Let us now consider the thresholding scheme (12), with  $P \in \mathbb{N}$  and  $\rho \geq 0$

$$\hat{q}(x) = \hat{p}(x)^\rho \mathbf{1}_{x \in \text{top}_P((x_t)_{t \in [T]}),} \quad q(x) = p(x)^\rho \mathbf{1}_{x \in [P]}.$$

We basically proceed with the same technique but with the event  $E_x$  the probability that  $x$  belongs to the top  $P$  of the empirical frequencies. When dealing with a binomial distribution, one can enumerate all possible outcomes for the empirical frequencies. For a template  $a \in \Delta_{[N]}$ , we said that a sequence  $(x_t)$  is of type  $a$  if its empirical frequency is equal to  $a$ ,

$$\mathcal{T}(a) = \{(x_t) \in [N]^T \mid \forall x \in [N], \sum_{t \in [T]} \mathbf{1}_{x_t=x} = Ta(x)\}.$$

Some enumeration arguments that can be found in Cover & Thomas (1991, Chapter 11) leads to

$$\mathbb{P}_{\mathcal{D}_T}((x_t) \in \mathcal{T}(a)) = |\mathcal{T}(a)| \exp(-T(H(a) + D_{\text{KL}}(a\|p))) \leq \exp(-T \cdot D_{\text{KL}}(a\|p)).$$

Hence, the probability that  $x$  does not belong to the top  $P$  of the empirical frequencies of  $(x_t)$  is bounded by

$$\mathbb{P}_{\mathcal{D}_T}(x \notin \text{top}_P(x_t) \in \mathcal{T}(a)) \leq \sum_{a \in \mathcal{A}} \exp(-T \cdot D_{\text{KL}}(a\|p)),$$

where  $\mathcal{A}$  is the set of all templates  $a$  where  $x$  is not in the top  $P$  of  $(a(x'))_{x' \in [N]}$ . With  $T$  samples over  $N$  elements there are at most  $(N+1)^T$  different type templates, hence

$$\sum_{a \in \mathcal{A}} \exp(c_a \cdot T) \leq (T+1)^N \sup_{a \in \mathcal{A}} \exp(c_a \cdot T) = \sup_{a \in \mathcal{A}} \exp(c_a \cdot T + N \log(T+1)).$$

As a consequence,

$$\mathbb{P}_{\mathcal{D}_T}(x \notin \text{top}_P(x_t) \in \mathcal{T}(a)) \leq \sup_{a \in \mathcal{A}} \exp(-T \cdot D_{\text{KL}}(a\|p)) + N \log(T+1)$$

Now, it is actually possible to remove the  $N \log(T + 1)$  in the exponential and extends this type of result to generic Polish spaces (see, e.g. Dinwoodie, 1992).

$$\mathbb{P}_{\mathcal{D}_T}(x \notin \text{top}_P(x_t) \in \mathcal{T}(a)) \leq \sup_{a \in \mathcal{A}} \exp(-T \cdot D_{\text{KL}}(a \| p))$$

We are left with the computation of the “information projection distance” between  $p$  and the set of distribution where  $x$  does not belong to the top  $P$ . In order to get  $x$  out of the top  $P$  of  $p$  one should switch  $p(x)$  with  $p(P)$ , which leads to (without caring for exact constants)

$$D_{\text{KL}}(p' \| p) \simeq p(x) \log(p(x)/p(P)) + p(P) \log(p(P)/p(x)) = (p(x) - p(P)) \log(p(x)/p(P))$$

When considering  $x < P/2$  and  $p$  following a Zipf law we get

$$D_{\text{KL}}(p' \| p) \gtrsim (p(x) - p(2x)) \log(p(P/2)/p(P)) \geq c_\alpha x^{-\alpha} (1 - 2^{-\alpha}) \alpha \log(2) = c'_\alpha p(x)$$

where  $c'_\alpha = c_\alpha (1 - 2^{-\alpha}) \alpha \log(2)$ . As a consequence, for any  $P \in \mathbb{N}$ ,

$$\begin{aligned} \mathbb{E}_{\mathcal{D}_T}[\mathcal{E}(f_{\hat{q}})] &\leq c_0 P^{-\alpha+1} + \sum_{x \in [P/2]} p(x) \mathbb{P}(f(x) \neq f_*(x)). \\ &\leq c_0 P^{-\alpha+1} + \sum_{x \in [P/2]} p(x) (\exp(-T c'_\alpha p(x)) + \mathbb{P}(f(x) \neq f_*(x) \mid x \in \text{top}_P((x_t)))) \\ &\leq c_0 P^{-\alpha+1} + \exp(-2^\alpha T c'_\alpha P^{-\alpha}) + \sum_{x \in [P/2]} p(x) \mathbb{P}(f(x) \neq f_*(x) \mid x \in \text{top}_P((x_t))). \end{aligned}$$

When  $\rho = 0$ , setting  $P = \min(c_1 d, T^{-1/\alpha} / \log(T))$  with  $c_1$  chosen so that all  $x$  stored in memory lead to  $f_*(x) = f(x)$  gives to the right scaling with both  $T$  and  $d$ : up to logarithmic factors,

$$\mathbb{E}[\mathcal{E}(f_{\hat{q}})] \lesssim d^{-\alpha+1} + T^{-1+1/\alpha} + \exp(-c_3 \log(T)^\alpha).$$

Because  $\alpha > 1$ , the last term decreases faster than any polynomial power of  $T$ , hence ends up being negligible in front of  $T^{-1+1/\alpha}$ .

For the case  $\rho \in (0, 1]$  one can dissociate two events: the event where  $x$  belongs to the top  $P/2$  empirical frequencies; the event where  $\hat{p}(x) > p(x)/2$ ; and conclude with similar derivations as precedently

$$\begin{aligned} \mathbb{E}[\mathcal{E}(f_{\hat{q}})] &\leq c_0 P^{-\alpha+1} + \exp(-2^\alpha T c'_\alpha P^{-\alpha}) + c_4 T^{-1+1/\alpha} \\ &\quad + \sum_{x \in [P/2]} p(x) \mathbb{P}(f(x) \neq f_*(x) \mid x \in \text{top}_P((x_t)), \hat{p}(x) > p(x)/2). \end{aligned}$$

Retaking previous arguments leads to the same scalings as the ones of Proposition 3 with respect to  $d$  and a scaling in  $T^{-1+1/\alpha}$  with respect to  $T$ . This ends the proof of the mixed scaling with both finite data and finite memory capacity.

## A.9 LEARNING THE INPUTS EMBEDDINGS

In instances where the embeddings are learned within the linear model (2), one may optimize them by merging all input token embeddings that are associated with the same output, which is what we actually observed in practice in Figure 8. Proposition 5 captures the resulting theoretical performance.

**Proposition 5** (Improvement for learned inputs embeddings). *Let the input embeddings be set to  $e_x = u_{f_*(x)}$ . Assume without restrictions that  $p(y)$  is decreasing with  $y$ . Consider the unembeddings where  $(u_y)_{y \in [P]}$  are  $\eta$ -quasi orthogonal, and  $u_y = 0$  if  $y$  is not among the  $P$ -th most frequent classes. Let  $q_0 \in \mathbb{R}^N$ , and set  $q \in \mathbb{R}^M$  as  $q(y) = \sum_{x: f_*(x)=y} q_0(x)$ , then*

$$\mathcal{E}(f_{W_{q_0}}) \leq p(\{x \mid \mathbf{1}_{f_*(x) \notin [P]} q(f_*(x)) < 2\eta \|q\|_\infty + 2\eta^2 \|q\|_1\}). \quad (49)$$

*In particular, it is possible to consider a thresholding associative scheme  $q_*$  such that, if  $y$  follows a Zipf law  $p(y) = C_\beta y^{-\beta}$ ,  $\mathcal{E}(f_{W_{q_*}}) = O((d/\log(d))^{-\beta+1})$ .*

Proposition 5 shows that when learning the input embeddings one can expect to replace the scaling in  $d^{-\alpha+1}$  that depends on the law of  $x$ , by a scaling that depends on the law of  $y$ . It illustrates the usefulness to learn embeddings when the law of  $x$  is well factored by the law of  $y$ . This is typically the case when  $x$  are news articles associated with a few topics  $y$ .

*Proof.* When  $e$  can be optimized, it is natural to set  $e_x$  to be a constant for all  $x$  that are associated with the same output. Let  $q_0 \in \Delta_{[N]}$  be an associative scheme,

$$\mathbf{1}_{f_{W_{q_0}}(x_0) \neq f_*(x_0)} = \mathbf{1}_{\max_{y \neq f_*(x_0)} \sum_{x \in [N]} q_0(x) e_x^\top e_x u_x^\top (u_y - u_{f_*(x_0)}) > 0}.$$

In order to lower the probability, one wants to minimize the left expression, which leads to the will to maximize  $e_{x_0}^\top e_x u_{f_*(x)}^\top u_{f_*(x_0)}$ . This can be done by setting

$$\forall x, x' \in [N], \quad e_x^\top e_{x'} = u_{f_*(x)}^\top u_{f_*(x')}.$$
 (50)

Such an isometry can be built by setting  $e_x = u_{f_*(x)}$ , leading to the new characterization

$$\mathbf{1}_{f_{W_{q_0}}(x_0) \neq f_*(x_0)} = \mathbf{1}_{\max_{y \neq y_0} \sum_{z \in [M]} q_0(z) u_{y_0}^\top u_z u_z^\top (u_y - u_{y_0}) > 0},$$

where  $y_0 = f_*(x_0)$  and

$$q(y) := \sum_{x; f_*(x)=y} q_0(x).$$
 (51)

When  $u$  are  $\eta$ -quasi orthogonal for its first  $P$  values and set to zero otherwise, we have

$$\begin{aligned} \sum_{z \in [M]} q(z) u_{y_0}^\top u_z u_z^\top (u_y - u_{y_0}) &= q(y_0)(u_{y_0}^\top u_y - 1) + q(y)(u_{y_0}^\top u_y - (u_{y_0}^\top u_y)^2) \\ &\quad + \sum_{z \in [M] \setminus \{y, y_0\}} q(z) u_{y_0}^\top u_z (u_z^\top u_y - u_z^\top u_{y_0}) \\ &\leq -q(y_0) + |q(y_0)|\eta + |q(y)|\eta + \sum_{z \in [M] \setminus \{y, y_0\}} |q(z)|\eta(\eta + \eta) \\ &\leq -q(y_0) + 2\eta \sup_{z \neq y_0} |q(z)| + 2\eta^2 \sum_{z \in [M]} |q(z)| \\ &= -q(y_0) + 2\eta \|q\|_\infty + 2\eta^2 \|q\|_1. \end{aligned}$$

As a consequence, we get

$$\mathcal{E}(f_{W_{q_0}}) \leq \sum_{x \in [N]} p(x) \mathbf{1}_{q(f_*(x)) \leq 2\eta \|q\|_\infty + 2\eta^2 \|q\|_1}.$$

Using that, for any  $A : [M] \rightarrow \mathbb{R}^d$ ,  $\sum_x p(x) A(f_*(x)) = \sum_x \sum_y p(x, y) A(y) = \sum_y p(y) A(y)$ ,

$$\mathcal{E}(f_{W_{q_0}}) \leq \sum_{y \in [M]} p(y) \mathbf{1}_{q(y) \leq 2\eta \|q\|_\infty + 2\eta^2 \|q\|_1}. \quad (52)$$

Note that when the embeddings  $u$  are chosen uniformly at random on the sphere, and  $d > 4 \log(M)$ , a similar bound will hold up to an extra higher-order term as seen in the proof of Theorem 1.

When  $u$  is defined to be zero on  $[M] \setminus [P]$ , and only  $\eta$ -quasi orthogonal for  $(u_y)_{y \in [P]}$ , the same characterization holds with

$$\mathcal{E}(f_{W_{q_0}}) \leq \sum_{y \in [M] \setminus [P]} p(y) + \sum_{y \in [P]} p(y) \mathbf{1}_{q(y) \leq 2\eta \|q\|_\infty + 2\eta^2 \|q\|_1}. \quad (53)$$

Finally, if  $\eta^2$  is set to  $1/4P$ , and  $q_* = \mathbf{1}_{y \in [P]}$ , we get the upper bound

$$\mathcal{E}(f_{W_{q_0}}) \leq p(\{x \mid f_*(x) > P\}).$$

The best  $P$  that one can consider is that such  $d/4P = \eta^2 d = 4 \log(P)$ . Setting  $P = d/16 \log(d)$ , and bounding  $\sum_{y > P} y^{-\beta} \leq \int_P^\infty t^{-\beta} dt$  ends the proof.  $\square$

### A.9.1 DISCUSSION ON COMPENSATION MECHANISMS

When optimizing the embeddings, one may turn the negative interference mechanisms illustrated in Figure 2 into positive ones.

Assume that  $e_x = u_{f_*(x)}$ , our model (4) become, denoting  $u_{f_*(x)} = u_0$  for simplicity,

$$f(x) = \arg \max_{y \in [M]} u_y^\top W u_0; \quad W = \sum_{y' \in [M]} q(y') u_{y'} u_{y'}^\top. \quad (54)$$

Similarly as before an error is made when

$$\max_{y \in [M]} \sum_{y' \in [M]} q(y') (u_y - u_0)^\top u_{y'} u_{y'}^\top u_0 > 0. \quad (55)$$

When the output embeddings are learned, one can optimize them to induce compensation mechanisms. For example, when  $M = 3$ , and  $y_1$  is competing when  $y_0 = f_*(x)$  as the argmax of (54) due to a large storage of  $q(y_1)$  compared to  $q(y_0)$ , one could benefit of  $q(y_2)$  to ensure that

$$\begin{aligned} & q(y_0)(u_1^\top u_0 - 1) + q(y_1)(1 - u_1^\top u_0)u_1^\top u_0 + q(y_2)(u_1 - u_0)^\top u_2 u_2^\top u_0 \\ & < 0 < q(y_0)(u_1^\top u_0 - 1) + q(y_1)(1 - u_1^\top u_0)u_1^\top u_0. \end{aligned}$$

In this situation, the score  $u_0^\top W e_x$  of  $y_0$  would be higher then  $u_{y_1}^\top W e_x$  ensuring that we do not make an error when predicting  $f(x)$  (54).

We refer the interested reader to Elhage et al. (2022) for related investigation.

### A.10 LOSS GRADIENT

The cross-entropy loss is written as

$$\ell((x, y, W)) = -\log\left(\frac{\exp(u_y^\top W e_x)}{\sum_{z \in [M]} \exp(u_z^\top W e_x)}\right) = -u_y^\top W e_x + \log\left(\sum_{z \in [M]} \exp(u_z^\top W e_x)\right).$$

Hence stochastic gradient descent will update the matrix  $W$  by adding terms of the form

$$\begin{aligned} \partial_W \ell((x, y), W) &= -u_y e_x^\top + \frac{\sum_{z \in [M]} \exp(u_z^\top W e_x) u_z e_x^\top}{\sum_{y \in [M]} \exp(u_y^\top W e_x)} \\ &= -u_y e_x^\top + \sum_{z \in [M]} p_W(z|x) u_z e_x^\top \\ &= -(1 - p_W(y|x)) u_y e_x^\top + \sum_{z \neq y} p_W(z|x) u_z e_x^\top \\ &= -(1 - p_W(y|x)) (u_y e_x^\top - \sum_{z \neq y} \frac{p_W(z|x)}{1 - p_W(y|x)} u_z e_x^\top). \end{aligned}$$

Note that  $p_W(z|x)/(1 - p_W(y|x))$  corresponds the the probability of the  $z$  conditioned with respect to  $x$  under the event that  $z$  is not  $y$ , formally

$$\frac{p_W(z|x)}{1 - p_W(y|x)} = p(z|x, z \neq y).$$

Finally,

$$\begin{aligned} \partial_W \ell((x, y), W) &= -(1 - p_W(y|x)) (u_y e_x^\top - \sum_{z \neq y} p_W(z|x, z \neq y) u_z e_x^\top) \\ &= -(1 - p_W(y|x)) (u_y e_x^\top - \mathbb{E}_{z \sim p_W}[u_z | x, z \neq y] e_x^\top). \end{aligned}$$

While, it is clear that the model (4) does not describe the solution found by cross entropy, one might hope that the term  $\mathbb{E}[u_z] e_x^\top$  will somewhat cancel themselves out and be an order of magnitude smaller than the leading term  $u_y e_x^\top$ .

### A.11 APPROXIMATE UPDATES

The formula (20) is justified by the fact that a matrix  $W_t = W_{q_t}$  will lead to an update (18) at time  $t$  according to the rule (19), assuming  $\exp(u_z W e_x) \approx 1$  for any  $z \neq f_*(x)$ ,

$$q_{t+1}(x) - q_t(x) = \mathbf{1}_{x_t=x} \gamma \cdot (1 - p_{W_{q_t}}(f_*(x)|x)) \approx \frac{\mathbf{1}_{x_t=x} \gamma}{1 + (M-1)^{-1} \exp(q_t(x))},$$

together with the fact that  $x$  will be seen  $Tp(x)$  times on average in  $T$  samples.

Similarly, very large batch size  $b = |B|$  and  $T/b$  update steps, each  $x$  will appear in each batch about  $bp(x)$  times, which leads to the rough approximation

$$q_{\gamma,b}(x) = f^{T/b}(0) = \underbrace{f \circ f \circ \dots \circ f}_{T/b \text{ times}}(0), \quad \text{where} \quad f : x \mapsto x + \frac{\gamma bp(x)}{1 + M^{-1} \exp(x)}. \quad (56)$$

In practice, we can approximate the effect of a batch by counting how many times  $x$  was in this batch and setting  $bp(x)$  to be the exact count, which will lead to tighter approximation. This is this approximation that we plot on Figure 13.

### A.12 GRADIENT FOR LAYER NORM

Let  $x \in [N]$ ,  $y \in [M]$  and  $W \in \mathbb{R}^{d \times d}$ . When processing the input  $x$ , layer norm adds a normalization layer

$$f : W \mapsto \bar{W} = \frac{W}{\|W e_x\|}.$$

Using the chain rule, with  $D$  denoting the Jacobian operator,

$$\nabla_W \ell(x, y; f(W)) = (D_W f(W))^\top \nabla_{f(W)} \ell(x, y; f(W)) = (D_W f(W))^\top \nabla_{\bar{W}} \ell(x, y; \bar{W}).$$

We are left with the computation of the Jacobian. We proceed with chain rule

$$f(W) = f_1(f_2(f_3(W))) \cdot W, \quad f_1 : t \in \mathbb{R} \mapsto t^{-1}, f_2 : e \in \mathbb{R}^d \mapsto \|e\|, f_3 : W \in \mathbb{R}^{d \times d} \mapsto W e_x.$$

$$\begin{aligned} D_W f(W)^\top &= \nabla_W (f_1 \circ f_2 \circ f_3)(W) W^\top + f_1(f_2(f_3(W))) \cdot I \\ &= \frac{-\nabla_W (f_2 \circ f_3)(W)}{f_2(f_3(W))^2} W^\top + \frac{1}{\|W e_x\|} \cdot I = \frac{-f_3(W)(D_W f_3(W))}{\|f_3(W)\| \|W e_x\|^2} W^\top + \frac{1}{\|W e_x\|} \cdot I \\ &= \frac{-W e_x e_x^\top}{\|W e_x\|^3} W^\top + \frac{1}{\|W e_x\|} \cdot I = \frac{1}{\|W e_x\|} (I - \bar{W} e_x e_x^\top \bar{W}^\top). \end{aligned}$$

This proves the formula written in the main text.

## B EXPERIMENTAL DETAILS

### B.1 MAXIMAL PARAMETERS UPDATES

In order to carefully choose step-sizes that scale well with width  $d$  in optimization algorithms, we follow Yang et al. (2021) and consider learning rates consistent with maximal feature learning updates. Here we consider the following initializations:

- $W$  is initialized as a Gaussian random matrix with  $\mathcal{N}(0, \frac{1}{d})$  entries.
- Input embeddings  $e_x$  and output embeddings  $u_y$  are initialized as either random on the unit-sphere in  $d$  dimensions, or with Gaussian  $\mathcal{N}(0, \frac{1}{d})$  entries. In both cases, every embedding has norm  $\approx 1$ .

**Updates to  $W$ .** The updates to the matrix  $W$  look as follows:

- SGD with step-size  $\eta_W$ :

$$W' = W + \eta_W \delta W, \quad \delta W = \sum_j \alpha_j u_{y_j} e_{x_j}^\top,$$

with  $\alpha_j = \Theta_d(1)$ , and a dimension-independent number of elements in the sum. Choosing  $\eta_W = \Theta(1)$  then ensures that for any input embedding  $e_x$ , we have  $\|W'e_x\| = \Theta(1)$  as desired.

- Adam (idealized here as signSGD) with step-size  $\eta$ :

$$W' = W + \eta_W \text{sign}(\delta W), \quad \text{sign}(\delta W)_{ij} = \frac{\delta W_{ij}}{|\delta W_{ij}|}.$$

The coordinates of  $\text{sign}(\delta W)$  are now  $\Theta(1)$  instead of  $\Theta(1/d)$ , thus the step-size needs to be taken as  $\eta_W = \Theta(1/d)$  in order to satisfy  $\|W'e_x\| = \Theta(1)$  (see (Yang et al., 2021; Yang & Littwin, 2023) for more details)

**Updates to embeddings.** The updates to embeddings look as follows:

- SGD updates:

$$\begin{aligned} u'_y &= u_y + \eta_u \delta u_y, & \delta u_y &= \sum_j \alpha_j W e_{x_j}, \\ e'_x &= e_x + \eta_e \delta e_x, & \delta e_x &= \sum_j \alpha'_j W^\top u_{y_j}, \end{aligned}$$

with  $\alpha_j = \Theta(1)$  and a dimension-independent number of  $j$ s. Since the algorithm ensures  $\|W e_{x_j}\| = \Theta(1)$  and  $\|W^\top u_{y_j}\| = \Theta(1)$  throughout training, choosing  $\eta_u, \eta_e = \Theta(1)$  ensures that these conditions continue to hold after each update.

- Adam/signSGD updates:

$$\begin{aligned} u'_y &= u_y + \eta_u \text{sign}(\delta u_y), & (\text{sign}(\delta u_y))_i &= \frac{(\delta u_y)_i}{|(\delta u_y)_i|}, \\ e'_x &= e_x + \eta_e \text{sign}(\delta e_x), & (\text{sign}(\delta e_x))_i &= \frac{(\delta e_x)_i}{|(\delta e_x)_i|}. \end{aligned}$$

Since the updates have coordinates of order  $\Theta(1)$ , in order to ensure that embeddings remain of norm  $\Theta(1)$  after each update, we thus need  $\eta_u, \eta_e = \Theta(1/\sqrt{d})$ .

## B.2 ADDITIONAL FIGURES

Our theory predicted optimal scaling laws in  $d^{-1+\alpha}$ . However, there are some catches behind the proof:

- The lower bound is true when  $d \ll N = 100$ , otherwise the error can actually reach zero when  $d$  becomes larger than a tipping number  $d_t$  which compares to  $N$ . This fact was illustrated on Figure 3. Increasing  $N$  augments the tipping point  $d_t$ , rectifying the learning curve as illustrated on Figure 9.
- This was proven for models where  $q(x, y) = q(x)$ , and where  $q(x)$  is not optimized with respect to  $f_*(x)$ . As such, it is not clear if those lower bounds hold for optimization-based algorithms, although we argue that we do not expect different mechanisms to take place in the proofs. We illustrate this empirically in the left of Figure 12.

Similarly, the unreasonable effect of learning the embeddings would be highly disappointing if those were hard to optimize in practice. The right of Figure 12 illustrates how with a few steps, one can achieve a zero generalization error when learning the embeddings.

In order to better understand gradient updates, Figure 14 shows the dynamic of the association memory  $W$  updated with SGD and a large step size. To validate the approximation (20), Figure 4 plots the generalization error associated with SGD and its theoretical approximation, while Figure 5 illustrates the idealized association scheme  $q_\gamma$  associated with a step size  $\gamma$ , batch size one and a Zipf law on  $x \in [N]$ .

In order to understand the effect of Adam, we compare it with plain SGD and SGD with rescaled variance on population data. That is, we consider gradient descent with  $\nabla_W \mathcal{L}(W)$  (16). The rescaled variance SGD, consists in dividing the gradient by the variance of  $\nabla_W \ell(X, f_*(X); W)$  (17) when

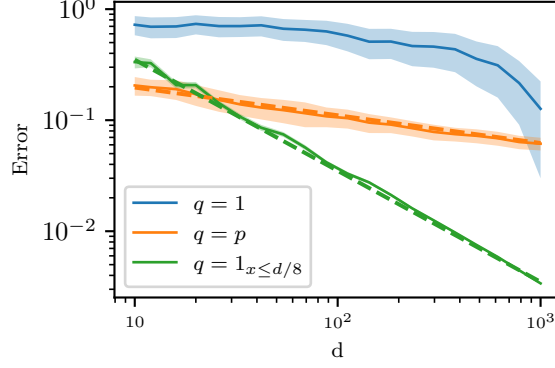

**Figure 9:** Same figure as the right one of Figure 3 yet with a bigger  $N$ , here  $N = 1000$ . The dashed curves represent  $\mathcal{E} = .35 \cdot d^{-1/4}$  (orange) and  $\mathcal{E} = 3.5 \cdot d^{-1}$  (green). They validate the scaling predicted by theory where we used  $N = +\infty$  to get tight polynomial scalings of  $\mathcal{E}$  (5) with respect to  $d$ .

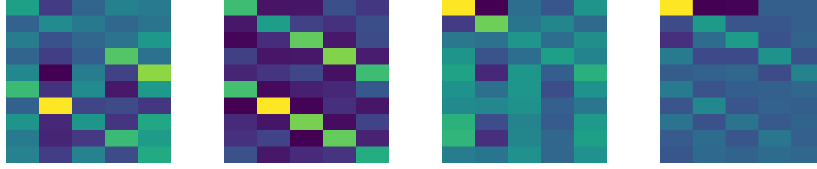

**Figure 10:** Representation of the weight matrix  $(u_y^\top W e_x)_{y,x} \in \mathbb{R}^{M \times N}$  for  $N = 10$ ,  $M = 5$ ,  $f_*(x) = x \bmod M$ . The data  $x$  follows a Zipf-law with  $\alpha = 1$  and  $T = 10^3$ . The matrix  $W$  is obtained according to (4) together with the scheme (11). Left:  $\rho = 0$  (10),  $d = 10$ , there is not enough memory capacity, and the model does not succeed to store memories, leading to a large generalization error. Middle left:  $\rho = 0$  (10),  $d = 50$ , there is enough memory capacity, we learn the right association  $y = x \bmod M$ . Middle right:  $\rho = 1$  (11),  $d = 10$ , the weighting  $q$  allows to store the most important memories beside having a small memory capacity. Right:  $\rho = 1$  (11),  $d = 50$ , the weighting  $q$  is too strong which does not allow to store memory associated with rare association (bottom of the matrix).

$X \sim p(1)$ . For simplicity, we consider Adam with  $\beta_1 = \beta_2 = 0$ , in which case, it equates sign SGD, i.e., SGD when considering the sign of each entries of  $\nabla_W \mathcal{L}(W)$  in the updates  $W_t \rightarrow W_{t+1}$ . Figures 15 and 16 underpins our intuition that the usefulness of Adam lies in its ability to rescale gradient updates, an effect that could equally be obtained by tuning the learning rate.

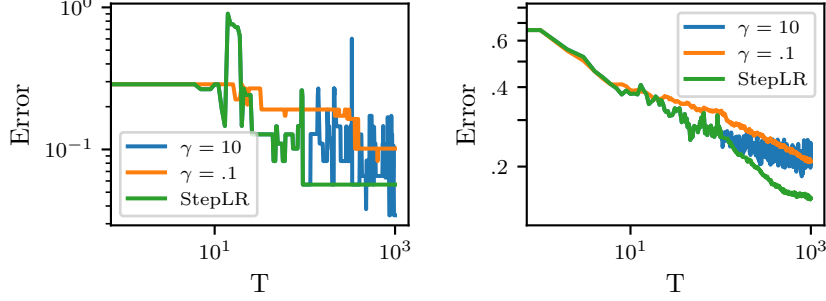

**Figure 11:** Learning curve of the generalization error  $\mathcal{E}$  (5) with respect to the number of data processed by stochastic gradient descent in the setting of Figure 6. Left: comparison on a single run. A big step size allows to store more memory at the risk of overwriting past association, which explains the higher variance of the blue curve but its overall better performance. A small step size will avoid loss spikes due to memory overwriting, but will take more time to store rare associations, leading to worse performance. By decreasing the learning rates along training, e.g., with the “StepLR” scheduler (Paszke et al., 2019), one can get the best of both world, i.e., store memories fast at the beginning of training when storage capacity is underused, while being more cautious at the end of training when there is no more “free” memory space. Right: Similar plot with  $N = 30$  averaged over one hundred runs.

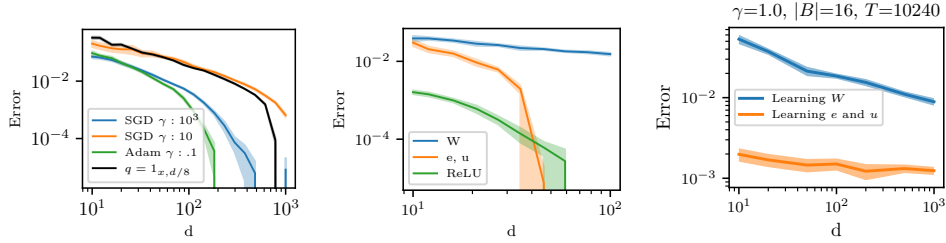

**Figure 12:** Scalings with respect to  $d$  for optimization-based algorithms, in the setting of Figure 3. Left: optimization-based algorithms beat the best algorithm designed by hands with  $q(x, y) = q(x)$ . Note how the curve seems to have the same optimal exponent  $\mathcal{E} \propto d^{-\alpha+1}$  (the left part of the figure show similar slopes for all curves) yet with smaller constant in front, leading to earlier tipping point before reaching zero generalization error due to full storage of all the associations. Middle: Comparison of learning the sole matrix  $W$  (blue), or learning the embeddings  $e$  and  $u$  (orange), together with the possibility to use non-linear model  $u_y \text{ReLU}(e_x)$  with  $e$  and  $u$  learned (green). All curves are obtained after  $10^3$  updates with batch size  $10^3$ . Right: Comparison with the same setting as Figure 7. Learning the embeddings or going non-linear allows to impressively optimize memory storage, leading to better exponent with respect to  $d$  and earlier tipping point for a fixed number of updates.

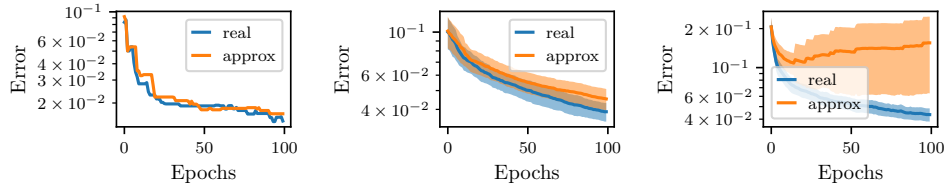

**Figure 13:** Same as Figure 4 yet with batch size equals one thousands  $|B| = 10^3$ .



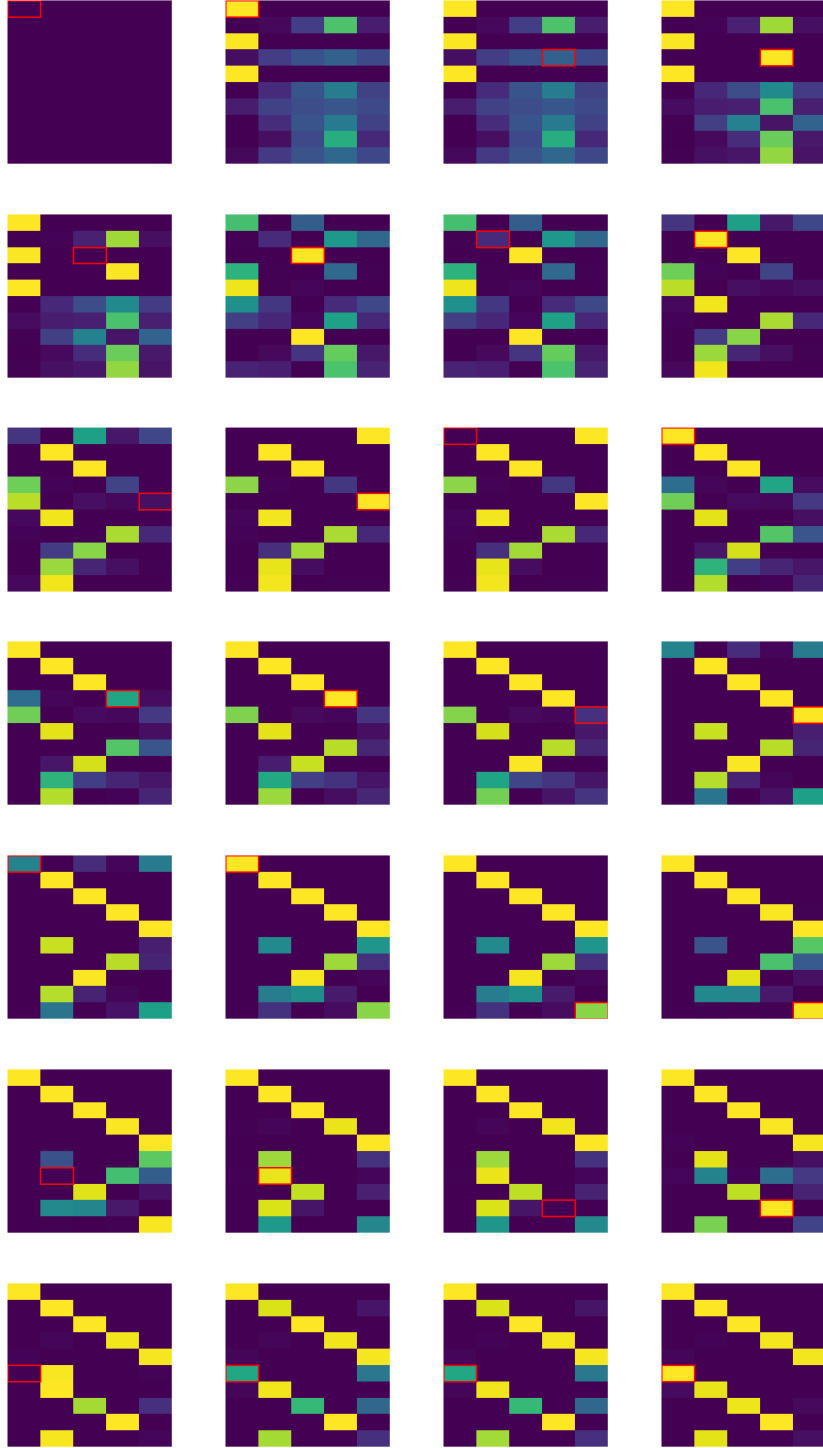

**Figure 14:** Gradient descent dynamics similar to Figure 6 with  $d = 10$  and a fixed step size  $\gamma = 10$ . From time to time, we represent here  $t \in \{0, 4, 5, 6, 8, 9, 11, 30, 32, 37, 49, 62, 75, 90\}$ , stochastic gradient descent will hit an association that is not properly stored in memory yet (the red boxes). It will consequently update the weight matrix  $W_t \rightarrow W_{t+1}$  (side by side pairs) to store it. When  $d$  is big enough, here  $d = 10$ ,  $W$  will end by storing correctly all associations, leading to perfect generalization for future examples.

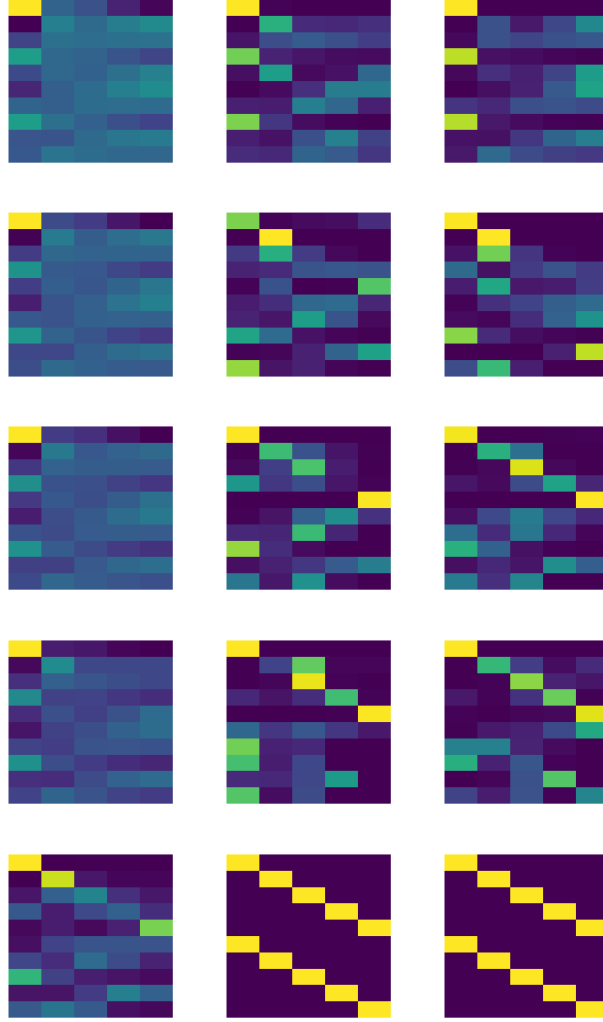

**Figure 15:** Comparison between SGD, signSGD and SGD with normalized variance on population gradient seen from the association matrix  $W_t$  at different times in the setting of Figure 14. The different rows correspond to the matrices  $W_t$  at time  $t \in \{1, 2, 3, 7, 100\}$ . Left: Plain SGD. Middle: Adam with  $\beta_1 = \beta_2 = 0$ , i.e., SignSGD. Right: SGD with normalized variance.

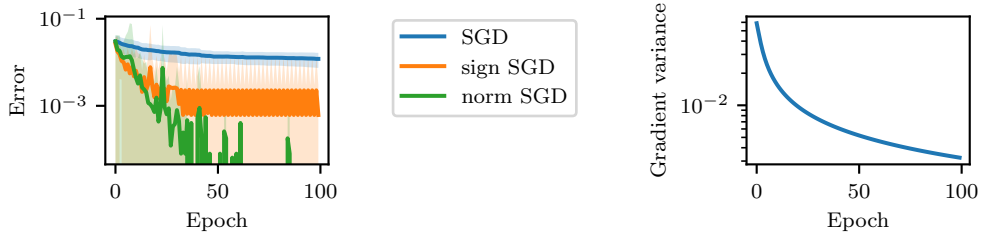

**Figure 16:** Left: Generalization error in the setting of Figure 15. Observe how SGD with rescaled variance (in green), an effect that can be done with SGD after adapting the learning rate, actually performs better than sign SGD (i.e., Adam with  $\beta_1 = \beta_2 = 0$ ). Right: Variance of SGD along the training. As the training goes, SGD is losing momentum due to smaller gradient variances, hence smaller updates.
